# Supplementary material
Source: PubMed Central journal article supplement (PMC7597678)
Supplement: NIHMS1036218-supplement-Online_Appendix.pdf [file NIHMS1036218-supplement-Online_Appendix.pdf]

Online Appendix to *Does home production replace consumption spending? Evidence from shocks in housing wealth in the Great Recession*

Jim Been \*

Susann Rohwedder †

Michael Hurd ‡

September 2018

---

\*Department of Economics at Leiden University and Netspar. Corresponding address: Department of Economics, Leiden University, PO Box 9520, Steenschuur 25, 2300 RA Leiden, the Netherlands. Tel.: +31 71 527 8569. (e-mail address: j.been@law.leidenuniv.nl).

†RAND Corp., Santa Monica, CA, USA, MEA and Netspar (e-mail address: susannr@rand.org).

‡RAND Corp., Santa Monica, CA, USA, NBER, MEA and Netspar (e-mail address: mhurd@rand.org).

## **A Online Appendix: Additional tables**

Table 1: Full estimation results<sup>a</sup>

|                                                        | (1)<br>Full sample |        | (2)<br>Full sample |        | (3)<br>Full sample |        | (4)<br>Fuller- <i>k</i> |        | (5)<br>Age 65-81 |        | (6)<br>Non-poor<br>health |        | (7)<br>Couples |        | (8)<br>Women |        |
|--------------------------------------------------------|--------------------|--------|--------------------|--------|--------------------|--------|-------------------------|--------|------------------|--------|---------------------------|--------|----------------|--------|--------------|--------|
| <b>Second-stage: <math>\Delta \ln(h_{int})</math></b>  | Coeff.             | S.E.   | Coeff.             | S.E.   | Coeff.             | S.E.   | Coeff.                  | S.E.   | Coeff.           | S.E.   | Coeff.                    | S.E.   | Coeff.         | S.E.   | Coeff.       | S.E.   |
| <i>Elasticity</i>                                      |                    |        |                    |        |                    |        |                         |        |                  |        |                           |        |                |        |              |        |
| $\Delta \ln(c_{int}^s)$                                | -0.50*             | (0.29) | -0.62*             | (0.36) | -0.65*             | (0.37) | -0.56*                  | (0.30) | -0.57*           | (0.31) | -0.60*                    | (0.34) | -0.76          | (0.49) | -0.43        | (0.31) |
| <i>Control variables</i>                               |                    |        |                    |        |                    |        |                         |        |                  |        |                           |        |                |        |              |        |
| $\Delta Age$                                           |                    |        |                    |        | 0.46**             | (0.21) | 0.44*                   | (0.19) | 0.71**           | (0.29) | 0.43**                    | (0.20) | 0.43           | (0.28) | 0.47**       | (0.22) |
| $\Delta Age^2 / 100$                                   |                    |        |                    |        | -0.27**            | (0.14) | -0.27**                 | (0.12) | -0.46**          | (0.19) | -0.24*                    | (0.13) | -0.31*         | (0.19) | -0.29**      | (0.14) |
| $\Delta 1(Age \geq 62)$                                |                    |        |                    |        | 0.03               | (0.14) | 0.02                    | (0.12) |                  |        | -0.02                     | (0.14) | -0.12          | (0.16) | 0.04         | (0.13) |
| $\Delta 1(Age \geq 65)$                                |                    |        |                    |        | -0.14              | (0.12) | -0.13                   | (0.11) | -0.20            | (0.13) | -0.11                     | (0.12) | -0.03          | (0.15) | -0.20        | (0.13) |
| $\Delta 1(Age \geq 70)$                                |                    |        |                    |        | -0.15*             | (0.09) | -0.14*                  | (0.08) | -0.17**          | (0.09) | -0.17*                    | (0.09) | -0.02          | (0.10) | -0.11        | (0.07) |
| $\Delta Health(-)$                                     |                    |        |                    |        | 0.04               | (0.07) | 0.04                    | (0.07) | 0.04             | (0.07) | 0.07                      | (0.07) | 0.18           | (0.13) | -0.04        | (0.07) |
| $\Delta Health(+)$                                     |                    |        |                    |        | 0.05               | (0.08) | 0.04                    | (0.07) | 0.05             | (0.07) | -0.03                     | (0.08) | 0.16           | (0.13) | -0.03        | (0.08) |
| $\Delta$ Partner retired                               |                    |        |                    |        | 0.01               | (0.06) | 0.00                    | (0.05) | 0.01             | (0.05) | 0.00                      | (0.05) | 0.01           | (0.07) | 0.04         | (0.06) |
| $\Delta Health(-)$ partner                             |                    |        |                    |        | 0.06               | (0.08) | 0.05                    | (0.07) | 0.08             | (0.08) | 0.08                      | (0.07) | 0.07           | (0.09) | -0.03        | (0.08) |
| $\Delta Health(+)$ partner                             |                    |        |                    |        | 0.03               | (0.09) | 0.02                    | (0.08) | 0.02             | (0.08) | 0.05                      | (0.09) | 0.03           | (0.10) | 0.02         | (0.09) |
| $\Delta Single$                                        |                    |        |                    |        | 0.99*              | (0.52) | 0.91**                  | (0.46) | 1.04**           | (0.49) | 0.39                      | (0.30) | 1.08*          | (0.61) | 1.09*        | (0.66) |
| $\Delta Partner$                                       |                    |        |                    |        | -0.15              | (0.25) | -0.13                   | (0.22) | -0.10            | (0.21) | -0.13                     | (0.23) | -0.12          | (0.41) | -0.13        | (0.23) |
| $\Delta Wave2007$                                      |                    |        | -0.13**            | (0.06) | -0.29*             | (0.17) | -0.27*                  | (0.14) | -0.27*           | (0.15) | -0.32**                   | (0.16) | -0.25          | (0.23) | -0.20        | (0.18) |
| $\Delta Wave2009$                                      |                    |        | -0.21**            | (0.10) | -0.54*             | (0.32) | -0.49*                  | (0.28) | -0.48*           | (0.29) | -0.58*                    | (0.31) | -0.39          | (0.41) | -0.39        | (0.34) |
| $\Delta Wave2011$                                      |                    |        | -0.35***           | (0.12) | -0.84*             | (0.48) | -0.78*                  | (0.42) | -0.77*           | (0.45) | -0.92**                   | (0.46) | -0.64          | (0.65) | -0.57        | (0.50) |
| <b>First-stage: <math>\Delta \ln(c_{int}^s)</math></b> |                    |        |                    |        |                    |        |                         |        |                  |        |                           |        |                |        |              |        |
|                                                        | Coeff.             | S.E.   | Coeff.             | S.E.   | Coeff.             | S.E.   | Coeff.                  | S.E.   | Coeff.           | S.E.   | Coeff.                    | S.E.   | Coeff.         | S.E.   | Coeff.       | S.E.   |
| <i>Instrument</i>                                      |                    |        |                    |        |                    |        |                         |        |                  |        |                           |        |                |        |              |        |
| $D_{GR} \Delta \ln(W_{it})$                            | 0.15***            | (0.05) | 0.14**             | (0.06) | 0.14**             | (0.06) | 0.14**                  | (0.06) | 0.17***          | (0.06) | 0.17***                   | (0.06) | 0.15**         | (0.06) | 0.16**       | (0.07) |
| $H_0 : \beta_{n2} = -1$                                | [0.09]             |        | [0.29]             |        | [0.35]             |        | [0.13]                  |        | [0.16]           |        | [0.24]                    |        | [0.62]         |        | [0.06]       |        |
| Observations ( $N \times T$ )                          | 2,500              |        | 2,500              |        | 2,500              |        | 2,500                   |        | 2,152            |        | 2,309                     |        | 1,511          |        | 1,583        |        |
| F-statistic                                            | 7.88               |        | 6.28               |        | 5.90               |        | 5.90                    |        | 8.91             |        | 6.55                      |        | 7.22           |        | 5.75         |        |

Notes: Standard errors reported in parentheses are robust to heteroskedasticity and autocorrelation. \* denotes significant at the 10% level, \*\* at the 5% level and \*\*\* at the 1% level. P-values reported in square brackets. Consumption spending is expressed in 2011 US dollars using the Consumer Price Index of the Bureau of Labor Statistics.

<sup>a</sup> Time use in home production and consumption spending are transformed using the inverse hyperbolic sine transformation. Changes in home production and consumption spending are trimmed for the top and bottom 1% of the sample in each survey wave following Angrisani et al. (2015); Hicks (2015). The sample for the estimation consists of persons aged 51-80, who own a house, who have not moved since the previous period, and who have retired since the previous period.

Table 2: Estimation results for different retirement definitions

|                                                        | (1)                                                              | (2)                                  | (3)              |
|--------------------------------------------------------|------------------------------------------------------------------|--------------------------------------|------------------|
|                                                        | Full retirees,<br>Out-of-labor-force,<br>Unemployed,<br>Disabled | Full retirees,<br>Out-of-labor-force | Full retirees    |
| <b>Second-stage: <math>\Delta \ln(h_{int})</math></b>  |                                                                  |                                      |                  |
| $\Delta \ln(c_{int}^s)$                                | -0.65*<br>(0.37)                                                 | -0.58*<br>(0.33)                     | -0.78*<br>(0.47) |
| <b>First-stage: <math>\Delta \ln(c_{int}^s)</math></b> |                                                                  |                                      |                  |
| $D_{GR} \Delta \ln(W_{it})$                            | 0.15**<br>(0.06)                                                 | 0.15**<br>(0.06)                     | 0.13**<br>(0.06) |
| $H_0 : \beta_{n2} = -1$                                | [0.35]                                                           | [0.21]                               | [0.65]           |
| Observations ( $N \times T$ )                          | 2,500                                                            | 2,471                                | 2,237            |
| F-statistic                                            | 5.90                                                             | 6.39                                 | 4.30             |

*Notes:* Standard errors reported in parentheses are robust to heteroskedasticity and auto-correlation, \* denotes significant at the 10% level, \*\* at the 5% level and \*\*\* at the 1% level. P-values reported in square brackets. Consumption spending is expressed in 2011 US dollars using the Consumer Price Index of the Bureau of Labor Statistics. All regressions include demographic controls and period dummies.

Table 3: Heterogeneity in the share of substitutable consumption,  $p_{it}$ , measured in percent

|                                 | (1)                          | (2)                | (3)                |
|---------------------------------|------------------------------|--------------------|--------------------|
|                                 | Full retirees,<br>Homeowners | Unrestricted       | Unrestricted       |
| <b>OLS: <math>p_{it}</math></b> |                              |                    |                    |
| Female                          | -0.90***<br>(0.34)           | -0.81***<br>(0.16) | -0.86***<br>(0.16) |
| Age 65+                         | 0.22<br>(0.45)               | 0.14<br>(0.15)     | 0.14<br>(0.17)     |
| Couple                          | -0.15<br>(0.34)              | 0.30*<br>(0.16)    | -0.48***<br>(0.17) |
| Poor health <sup>a</sup>        | -0.50<br>(0.65)              | -1.99***<br>(0.29) | -1.33***<br>(0.28) |
| Homeowner                       |                              |                    | 3.18***<br>(0.19)  |
| Retired                         |                              |                    | -0.13<br>(0.17)    |
| Constant                        | 10.67***<br>(0.57)           | 10.15***<br>(0.20) | 8.08***<br>(0.23)  |
| Observations ( $N \times T$ )   | 2,500                        | 11,448             | 11,407             |

*Notes:* Standard errors reported in parentheses are robust to heteroskedasticity, \* denotes significant at the 10% level, \*\* at the 5% level and \*\*\* at the 1% level. Consumption spending is expressed in 2011 US dollars using the Consumer Price Index of the Bureau of Labor Statistics.

<sup>a</sup> The dummy of poor health is constructed by using the response 'poor' to the self-reported health question in HRS ( $RwSHLT$ ).

Table 4: Importance of housing wealth in the MPC

|                                                        | (1)        | (2)        | (3)     | (4)     | (5)         |
|--------------------------------------------------------|------------|------------|---------|---------|-------------|
|                                                        | Homeowners | Homeowners | Renters | Renters | Stockowners |
| <b>Second-stage: <math>\Delta \ln(h_{int})</math></b>  |            |            |         |         |             |
| $\Delta \ln(c_{int}^s)$                                | -0.63*     | -0.67*     | 0.02    | -0.20   | -0.38       |
|                                                        | (0.35)     | (0.37)     | (0.25)  | (0.45)  | (0.62)      |
| <b>First-stage: <math>\Delta \ln(c_{int}^s)</math></b> |            |            |         |         |             |
| $D_{GR} \Delta \ln(W_{it})$                            | 0.13**     | 0.14**     |         |         |             |
|                                                        | (0.06)     | (0.06)     |         |         |             |
| $D_{GR} \Delta \ln(Fin_{it})$                          | -0.03      |            | 0.20    |         |             |
|                                                        | (0.05)     |            | (0.18)  |         |             |
| $D_{GR} \Delta \ln(Stock_{it})$                        |            | 0.01       |         | 0.23    | 0.04        |
|                                                        |            | (0.02)     |         | (0.19)  | (0.03)      |
| $H_0 : \beta_{n2} = -1$                                | [0.30]     | [0.37]     | [0.00]  | [0.07]  | [0.32]      |
| Observations ( $N \times T$ )                          | 2,500      | 2,500      | 511     | 511     | 516         |
| F-statistic                                            | 3.16       | 2.89       | 1.21    | 1.51    | 1.36        |

*Notes:* Standard errors reported in parentheses are robust to heteroskedasticity and autocorrelation, \* denotes significant at the 10% level, \*\* at the 5% level and \*\*\* at the 1% level. P-values reported in square brackets. Monetary values are expressed in 2011 US dollars using the Consumer Price Index of the Bureau of Labor Statistics. All regressions include demographic controls and period dummies.

Table 5: Conditioning the housing wealth drop on cyclical movements

|                                                        | (1)                   | (2)                     | (3)              | (4)              | (5)              | (6)              |
|--------------------------------------------------------|-----------------------|-------------------------|------------------|------------------|------------------|------------------|
|                                                        | Lag housing<br>wealth | 2nd difference<br>shock | Change HPI       | Change UR        | Change S&P500    | Placebo shock    |
| <b>Second-stage: <math>\Delta \ln(h_{it})</math></b>   |                       |                         |                  |                  |                  |                  |
| $\Delta \ln(c_{imt}^s)$                                | -0.63*<br>(0.37)      | -0.68*<br>(0.37)        | -0.59*<br>(0.34) | -0.61*<br>(0.34) | -0.49*<br>(0.30) | -0.65*<br>(0.37) |
| <b>First-stage: <math>\Delta \ln(c_{imt}^s)</math></b> |                       |                         |                  |                  |                  |                  |
| $D_{GR} \Delta \ln(W_{it})$                            | 0.13**<br>(0.06)      | 0.23**<br>(0.11)        | 0.14**<br>(0.06) | 0.13**<br>(0.06) | 0.13**<br>(0.06) | 0.13**<br>(0.06) |
| $\ln(W_{it-1}) (/100)$                                 | 0.34<br>(0.36)        |                         |                  |                  |                  |                  |
| $D_{GR} \Delta^2 \ln(W_{it})$                          |                       | -0.08<br>(0.08)         |                  |                  |                  |                  |
| $\Delta HPI_t (/100)$                                  |                       |                         | -0.61<br>(0.94)  |                  |                  |                  |
| $\Delta UR_t$                                          |                       |                         |                  | -0.07<br>(0.09)  |                  |                  |
| $\Delta S\&P500_t (/1000)$                             |                       |                         |                  |                  | 0.33<br>(0.39)   |                  |
| $D_{2011} \Delta \ln(W_{it})$                          |                       |                         |                  |                  |                  | -0.03<br>(0.06)  |
| $H_0 : \beta_{n2} = -1$                                | [0.31]                | [0.39]                  | [0.24]           | [0.24]           | [0.09]           | [0.33]           |
| Observations ( $N \times T$ )                          | 2,500                 | 1,519                   | 2,500            | 2,500            | 2,500            | 2,500            |
| F-statistic                                            | 2.81                  | 2.79                    | 2.92             | 3.22             | 3.31             | 2.88             |

Notes: Standard errors reported in parentheses are robust to heteroskedasticity and autocorrelation, \* denotes significant at the 10% level, \*\* at the 5% level and \*\*\* at the 1% level. P-values reported in square brackets. Monetary values are expressed in 2011 US dollars using the Consumer Price Index of the Bureau of Labor Statistics. All regressions include demographic controls and period dummies.

Table 6: The MPC for different consumption definitions

|                               | (1)               | (2)                               | (3)                       | (4)                    |
|-------------------------------|-------------------|-----------------------------------|---------------------------|------------------------|
|                               | Total<br>spending | Non-<br>substitutable<br>spending | Substitutable<br>spending | Dining out<br>spending |
| $D_{GR}\Delta\ln(W_{it})$     | -0.01<br>(0.02)   | -0.02<br>(0.01)                   | 0.14**<br>(0.06)          | 0.30***<br>(0.11)      |
| Observations ( $N \times T$ ) | 2,494             | 2,492                             | 2,500                     | 2,489                  |

*Notes:* Standard errors reported in parentheses are robust to heteroskedasticity and autocorrelation, \* denotes significant at the 10% level, \*\* at the 5% level and \*\*\* at the 1% level. P-values reported in square brackets. Consumption spending is expressed in 2011 US dollars using the Consumer Price Index of the Bureau of Labor Statistics. All regressions include demographic controls and period dummies.



Table 7: Shadow prices and human capital<sup>a</sup>

|                       | Average<br>$c_{int}^s$ | Average<br>$h_{int}$ | Average<br>Shadow price |
|-----------------------|------------------------|----------------------|-------------------------|
| Less than high-school | 2,258                  | 22.8                 | 2.9                     |
| GED                   | 2,897                  | 24.8                 | 3.5                     |
| High-school           | 3,401                  | 22.2                 | 4.5                     |
| Some college          | 4,291                  | 23.9                 | 5.3                     |
| College and more      | 6,662                  | 21.0                 | 9.4                     |
| Mean                  | 3,970                  | 22.6                 | 5.2                     |

<sup>a</sup> Substitutable spending is in USD per year. Home production is in hours per week. The shadow price is expressed in 2011 USD.

Table 8: Non-linearities in the MPC

|                                                                        | (1)              | (2)              | (3)              |
|------------------------------------------------------------------------|------------------|------------------|------------------|
|                                                                        | Full sample      | Full sample      | Full sample      |
| <b>Second-stage: <math>\Delta \ln(h_{int})</math></b>                  |                  |                  |                  |
| $\Delta \ln(c_{int}^s)$                                                | -0.64*<br>(0.38) | -0.54*<br>(0.32) | -0.56*<br>(0.33) |
| <b>First-stage: <math>\Delta \ln(c_{int}^s)</math></b>                 |                  |                  |                  |
| $D_{GR} \Delta \ln(W_{it})$                                            | 0.13**<br>(0.06) | 0.15**<br>(0.06) | 0.15**<br>(0.06) |
| $D_{GR} \Delta \ln(W_{it}) \cdot 1(D_{GR} \Delta \ln(W_{it}) > P25)^a$ | 0.04<br>(0.26)   |                  |                  |
| $D_{GR} \Delta \ln(W_{it}) \cdot 1(D_{GR} \Delta \ln(W_{it}) > P50)^b$ |                  | -0.21<br>(0.27)  |                  |
| $D_{GR} \Delta \ln(W_{it}) \cdot 1(D_{GR} \Delta \ln(W_{it}) > P75)^c$ |                  |                  | -0.16<br>(0.27)  |
| $H_0 : \beta_{n2} = -1$                                                | [0.34]           | [0.15]           | [0.19]           |
| Observations ( $N \times T$ )                                          | 2,500            | 2,500            | 2,500            |
| F-statistic                                                            | 2.77             | 3.11             | 2.99             |

Notes: Standard errors reported in parentheses are robust to heteroskedasticity and autocorrelation, \* denotes significant at the 10% level, \*\* at the 5% level and \*\*\* at the 1% level. P-values reported in square brackets. Monetary values are expressed in 2011 US dollars using the Consumer Price Index of the Bureau of Labor Statistics. All regressions include demographic controls and period dummies.

<sup>a</sup> P25 = -24.81%.

<sup>b</sup> P50 = -6.58%.

<sup>c</sup> P75 = 4.80%.

## B Online Appendix: Selections and definitions in HRS/CAMS 2005-2011

Table 9: Sample selection in HRS/CAMS

| Definition                                                   | Total observations |
|--------------------------------------------------------------|--------------------|
| (1) CAMS waves 3-6 <sup>a</sup>                              | 14,972             |
| (2) (1) + Time use component filled out                      | 14,941             |
| (3) (2) + Respondents aged 51-80                             | 12,714             |
| (4) (3) + Non-missing home production <sup>b</sup>           | 12,566             |
| (5) (4) + Non-missing substitutable consumption <sup>b</sup> | 12,422             |
| (6) (5) + Taking first differences (CAMS wave 3-6)           | 7,230              |
| (7) (6) + Retired <sup>c</sup> ( $t$ and $t - 1$ )           | 3,413              |
| (8) (7) + Homeowners <sup>d</sup>                            | 2,748              |
| (9) (8) + Non-movers <sup>d</sup>                            | 2,500              |

<sup>a</sup> For comparability of time use categories we use four waves of CAMS (2005, 2007, 2009, and 2011) merged with the RAND HRS version M data file. Since the timing of the fielding of the HRS (even years) and CAMS (odd years) surveys are different, the variables in CAMS are merged to the preceding HRS wave, e.g. CAMS 2005 to HRS 2004, etc.

<sup>b</sup> Including top 1% and bottom 1% trimming of wave-to-wave changes.

<sup>c</sup> Based on the variable self-reported labor market status (*RwLBRF*) in the HRS data. People should be fully retired in consecutive waves. We assume that people are also retired when they are unemployed, disabled, or out-of-labor-force in consecutive waves.

<sup>d</sup> Based information on residence-bought or sold in HRS.

Table 10: Home production in HRS/CAMS 2005-2011  
(h/week)<sup>a</sup>

|                                           | Mean  | SD   | % Total |
|-------------------------------------------|-------|------|---------|
| <b>Home production activities</b>         |       |      |         |
| House cleaning                            | 4.7   | 5.6  | 3.0     |
| Laundry                                   | 2.5   | 3.0  | 1.6     |
| Gardening                                 | 2.8   | 5.2  | 1.8     |
| Shopping                                  | 3.8   | 3.7  | 2.4     |
| Cooking                                   | 6.8   | 6.3  | 4.3     |
| Financial management                      | 0.9   | 1.3  | 0.6     |
| Home maintenance                          | 0.7   | 1.8  | 0.4     |
| Vehicle maintenance                       | 0.4   | 1.1  | 0.3     |
| Home production                           | 22.6  | 16.2 | 14.3    |
| <b>Non home production activities</b>     |       |      |         |
| Watching TV                               | 24.2  | 17.5 | 15.3    |
| Reading newspapers or magazines           | 5.8   | 5.7  | 3.7     |
| Reading books                             | 3.9   | 6.4  | 2.5     |
| Listening to music                        | 5.6   | 9.8  | 3.5     |
| Playing games                             | 0.3   | 1.4  | 0.2     |
| Attending concerts/movies                 | 0.3   | 0.9  | 0.2     |
| Singing/playing instrument                | 1.6   | 4.6  | 1.0     |
| Arts and crafts                           | 0.7   | 2.7  | 0.4     |
| Dining out                                | 1.5   | 2.2  | 0.9     |
| Personal hygiene                          | 6.5   | 4.9  | 4.1     |
| Caring for pets                           | 2.6   | 9.7  | 1.6     |
| Managing medical condition                | 2.2   | 12.6 | 1.4     |
| Walking                                   | 5.5   | 9.0  | 3.5     |
| Sports and exercise                       | 2.2   | 5.9  | 1.4     |
| Visiting in-person with friends/family    | 7.8   | 12.2 | 4.9     |
| Communication by telephone/letters/e-mail | 5.3   | 7.6  | 3.3     |
| Physically showing affection              | 2.5   | 5.9  | 1.6     |
| Helping others                            | 1.5   | 3.7  | 0.9     |
| Attending religious services              | 1.0   | 1.6  | 0.6     |
| Attending meetings/clubs                  | 0.4   | 1.1  | 0.3     |
| Working for pay                           | 0.4   | 3.3  | 0.3     |
| Volunteer work                            | 0.8   | 2.9  | 0.5     |
| Using computer                            | 1.8   | 2.6  | 1.1     |
| Sleeping and napping                      | 47.9  | 18.8 | 30.2    |
| Praying/meditating                        | 3.7   | 6.5  | 2.3     |
| Total time use                            | 158.4 | 61.7 | 100.0   |

<sup>a</sup> Statistics are presented for our sample of 2,500 observations.

Table 11: Substitutable consumption spending in HRS/CAMS  
2005-2011 (USD/year)<sup>a</sup>

|                                                                   | Mean   | SD     | % Total |
|-------------------------------------------------------------------|--------|--------|---------|
| <b>Substitutability - Possible</b>                                |        |        |         |
| Dining out                                                        | 1,566  | 2,141  | 4.3     |
| Dishwasher                                                        | 20     | 105    | 0.1     |
| Housekeeping services                                             | 314    | 930    | 0.9     |
| Washer/Dryer                                                      | 67     | 266    | 0.2     |
| Gardening/Yard services                                           | 373    | 960    | 1.0     |
| Home repairs services                                             | 1,085  | 2,557  | 3.0     |
| Vehicle services                                                  | 546    | 715    | 1.5     |
| <b>Substitutability - Possible, Clear relation to substitutes</b> |        |        |         |
| Housekeeping materials                                            | 368    | 593    | 1.0     |
| Yard materials                                                    | 297    | 789    | 0.8     |
| Home repair materials                                             | 767    | 2,049  | 2.1     |
| <b>Substitutability - Possible, Not likely</b>                    |        |        |         |
| Clothing                                                          | 640    | 1,051  | 1.8     |
| Substitutable consumption                                         | 3,970  | 4,357  | 11.0    |
| Substitutable consumption (incl. mat.)                            | 5,402  | 5,484  | 14.9    |
| Substitutable consumption (incl. mat., clothing)                  | 6,042  | 5,879  | 16.7    |
| <b>Substitutability - Impossible</b>                              |        |        |         |
| Health insurance                                                  | 2,181  | 2,634  | 6.0     |
| Health services                                                   | 1,132  | 3,287  | 3.1     |
| Drugs                                                             | 1,026  | 1,838  | 2.8     |
| Medical supplies                                                  | 219    | 658    | 0.6     |
| Car payments                                                      | 1,163  | 2,989  | 3.2     |
| Auto insurance                                                    | 1,022  | 674    | 2.8     |
| Home/Rent insurance                                               | 842    | 798    | 2.3     |
| Mortgage                                                          | 1,848  | 4,827  | 5.1     |
| Property tax                                                      | 1,926  | 2,319  | 5.3     |
| Rent                                                              | 643    | 3,217  | 1.8     |
| Household furnishings                                             | 522    | 1,441  | 1.4     |
| Electricity                                                       | 1,552  | 1,266  | 4.3     |
| Heat                                                              | 918    | 1,065  | 2.5     |
| Water                                                             | 455    | 677    | 1.3     |
| Phone/Cable/Internet                                              | 1,386  | 987    | 3.8     |
| Tickets                                                           | 155    | 531    | 0.4     |
| Vacations                                                         | 1,691  | 2,973  | 4.7     |
| Refrigerator                                                      | 76     | 311    | 0.2     |
| Computer                                                          | 73     | 272    | 0.2     |
| Television                                                        | 145    | 432    | 0.4     |
| Hobbies                                                           | 236    | 604    | 0.7     |
| Sports equipment                                                  | 139    | 646    | 0.4     |
| Contributions                                                     | 1,663  | 3,469  | 4.6     |
| Gifts                                                             | 2,006  | 6,027  | 5.5     |
| Personal care                                                     | 532    | 974    | 1.5     |
| Food/Drink grocery                                                | 4,332  | 3,990  | 11.9    |
| Total consumption <sup>b</sup>                                    | 36,287 | 22,884 | 100.0   |

<sup>a</sup> Statistics are presented for our sample of 2,500 observations. Consumption spending is expressed in 2011 US dollars using the Consumer Price Index of the Bureau of Labor Statistics.

<sup>b</sup> We define total consumptions as the total of durable and nondurable consumption excluding the categories car purchases and car use.

Table 12: Changes in health<sup>a</sup> and marital status<sup>b</sup>

|                                    | Mean | SD   | Min. | Max. | P50  |
|------------------------------------|------|------|------|------|------|
| <b>Demographic characteristics</b> |      |      |      |      |      |
| Respondent's health worsened       | 0.24 | 0.43 | 0.00 | 1.00 | 0.00 |
| Respondent's health improved       | 0.21 | 0.41 | 0.00 | 1.00 | 0.00 |
| Spouse's health worsened           | 0.19 | 0.39 | 0.00 | 1.00 | 0.00 |
| Spouse's health improved           | 0.12 | 0.33 | 0.00 | 1.00 | 0.00 |
| Became couple                      | 0.01 | 0.09 | 0.00 | 1.00 | 0.00 |
| Became single                      | 0.03 | 0.17 | 0.00 | 1.00 | 0.00 |

<sup>a</sup> People's change in health is based on the self-reported health question in HRS (*RwSHLT*).

<sup>b</sup> Summary statistics are presented for our sample of 2,500 observations.

## C Online Appendix: Developments in the Great Recession

Figure 1: Development of houseprices in HRS.

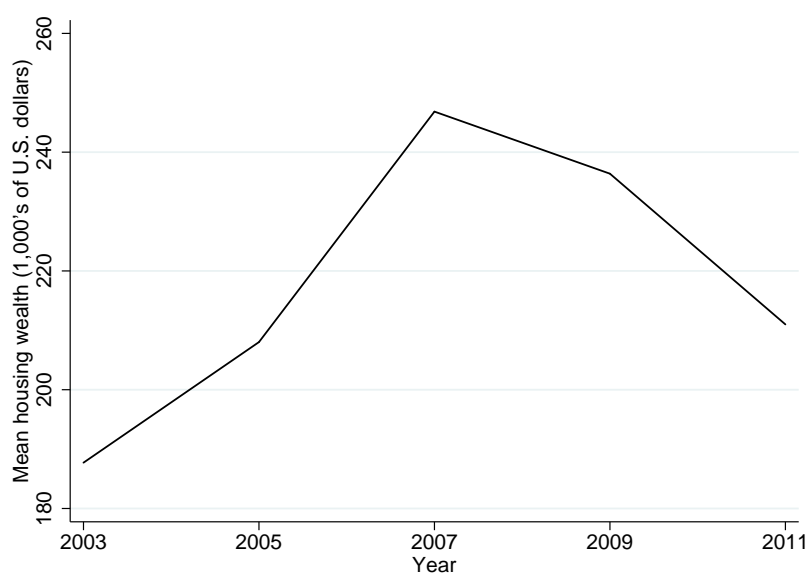

Source: RAND HRS. Based on the *HwAHOUS* variable. Housing wealth is expressed in 2011 US dollars using the Consumer Price Index of the Bureau of Labor Statistics. Due to the temporal misalignment between HRS and CAMS surveys, housing wealth corresponds to the (even) year preceding the odd-numbered year in CAMS.

Figure 2: Development of houseprice indices.

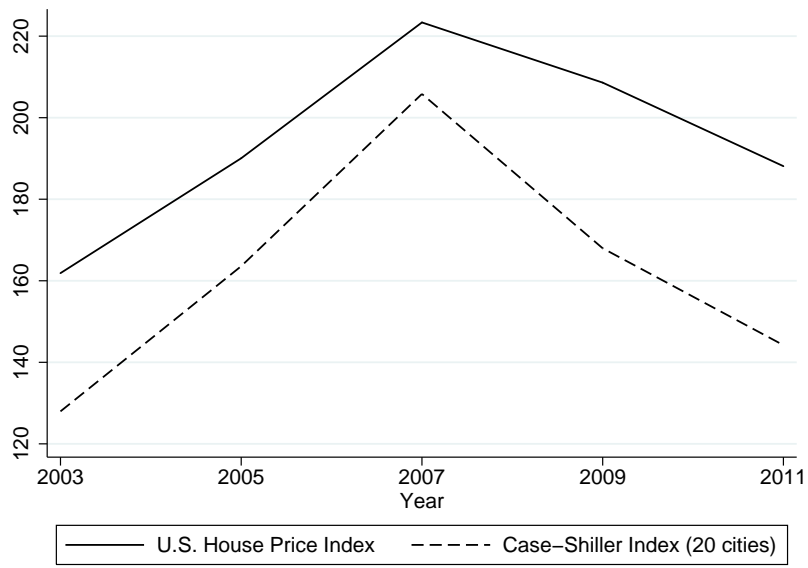

Source: Federal Housing Finance Agency (FHFA) and S&P Case-Shiller Home Price Indices. Due to the temporal misalignment between HRS and CAMS surveys, indices correspond to the (even) year preceding the odd-numbered year in CAMS.

Figure 3: Development of the U.S. House Price Index over nine census divisions.

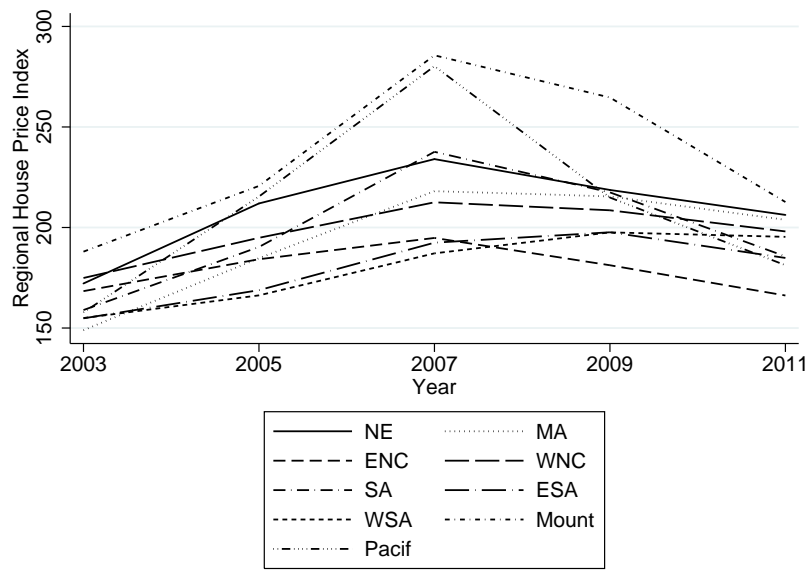

Source: Federal Housing Finance Agency (FHFA; quarterly statistics).

Note: New England (NE), Middle Atlantic (MA), East North Central (ENC), West North Central (WNC), South Atlantic (SA), East South Atlantic (ESA), West South Atlantic (WSA), Mountain (Mount), and Pacific (Pacif).



Figure 4: Development of the Unemployment Rate over nine census divisions.

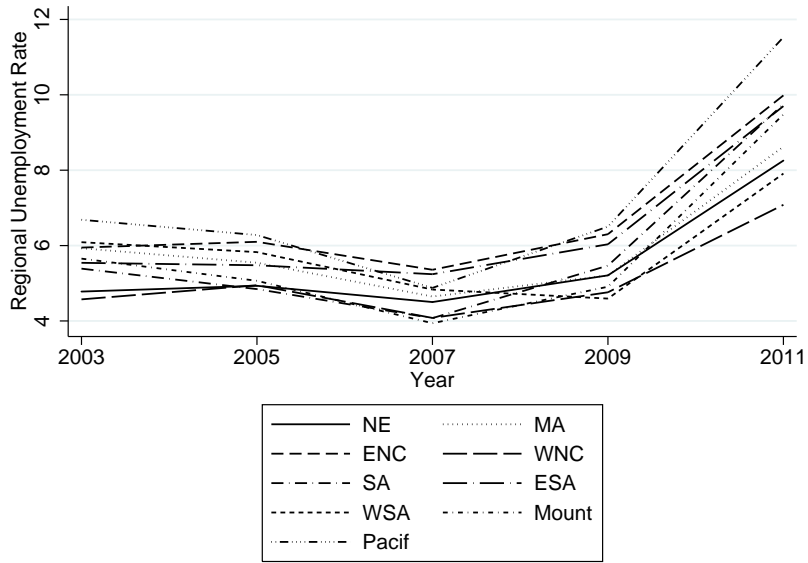

Source: Federal Bureau of Labor Statistics (quarterly statistics).

Note: New England (NE), Middle Atlantic (MA), East North Central (ENC), West North Central (WNC), South Atlantic (SA), East South Atlantic (ESA), West South Atlantic (WSA), Mountain (Mount), and Pacific (Pacif).

## References

Marco Angrisani, Michael Hurd, and Susann Rohwedder. The effect of housing and stock wealth losses on spending in the Great Recession. RAND Working Paper, No. WR-1101, 2015.

Daniel Hicks. Consumption volatility, marketization, and expenditure in an emerging market economy. *American Economic Journal: Macroeconomics*, 7(2):95–123, 2015.
